# Supplementary material
Source: Springer Nature journal article supplement (https://www.springermedizin.de/resource/supplementary/13037_2012_155_MOESM4_ESM.pdf/9659512)

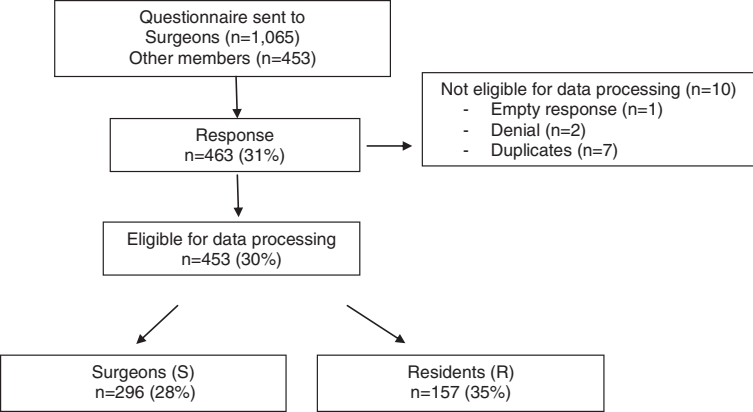

Supplement: MOESM4 [file 9659512]
